# Supplementary material for: Beta 3 Adrenoreceptor Agonist for the Management of Lower Urinary Tract Symptoms in Men With Benign Prostatic Hyperplasia: A Systematic Review
Source: PubMed Central journal article supplement — Int Neurourol J. 2021 Sep 30;25(3):182–91. doi: 10.5213/inj.2142068.034 (PMC8497732; doi:10.5213/inj.2142068.034), 2021-09-30
Supplement: inj-2142068-034-suppl1.pdf [file inj-2142068-034-suppl1.pdf]

## Supplementary Material 1. Search strategy

### MEDLINE

exp Prostatic Hyperplasia/  
(Prostat\* adj3 hyperplasia\*).tw.  
(Prostat\* adj3 hypertroph\*).tw.  
(Prostat\* adj3 adenoma\*).tw.  
(BPH or BPO or BPE).tw.  
(prostat\* adj3 enlarg\*).tw.  
exp Prostatism/  
Prostatism.tw.  
exp Urinary Bladder Neck Obstruction/  
(Bladder\* adj3 obstruct\*).tw.  
BOO.tw.  
1 or 2 or 3 or 4 or 5 or 6 or 7 or 8 or 9 or 10 or 11  
exp Adrenergic beta-3 Receptor Agonists/  
((beta3 or beta-3 or beta 3) adj3 (agonist\* or adrenergic or  
adrenoceptor)).tw.  
(mirabegron or Betmiga or Betanis or YM 178 or YM-178 or  
myrbetriq or sc 211912 or sc211912).tw,nm.  
(MVR3JL3B2V or 223673-61-8).tw,rn.  
13 or 14 or 15 or 16  
12 and 17  
randomized controlled trial.pt.  
controlled clinical trial.pt.  
randomized.ab.  
placebo.ab.  
drug therapy.fs.  
randomly.ab.  
trial.ab.  
groups.ab.  
19 or 20 or 21 or 22 or 23 or 24 or 25 or 26  
exp animals/ not humans.sh.  
27 not 28  
18 and 29

### Embase

#1 'prostate hypertrophy'/exp  
#2 (prostat\* NEAR/3 hyperplasia\*):ab,ti  
#3(prostat\* NEAR/3 hypertroph\*):ab,ti  
#4 (prostat\* NEAR/3 adenoma\*):ab,ti  
#5 'bph':ab,ti OR 'bpo':ab,ti OR 'bpe':ab,ti  
#6 (prostat\* NEAR/3 enlarg\*):ab,ti  
#7 'prostatism'/exp

#8 'prostatism':ab,ti  
#9 'bladder obstruction'/exp  
#10 (bladder\* NEAR/3 obstruct\*):ab,ti  
#11 'boo':ab,ti  
#12 #1 OR #2 OR #3 OR #4 OR #5 OR #6 OR #7 OR #8 OR #9  
OR #10 OR #11  
#13 'beta 3 adrenergic receptor stimulating agent'/exp  
#14 ((beta3 OR 'beta 3' OR 'beta 3') NEAR/3 (agonist\* OR ad-  
renergic OR adrenoceptor)):ti,ab  
#15 mirabegron:ti,ab,tn OR betmiga:ti,ab,tn OR betanis:ti,ab,tn  
OR 'ym 178':ti,ab,tn OR myrbetriq:ti,ab,tn OR 'sc 211912':  
ti,ab,tn OR sc211912:ti,ab,tn  
#16 mvr3jl3b2v:ti,ab,rn OR '223673 61 8':ti,ab,rn  
#17 #13 OR #14 OR #15 OR #16  
#18 #12 AND #17  
#19 'crossover procedure':de OR 'double-blind procedure':de  
OR 'randomized controlled trial':de OR 'single-blind  
procedure':de OR random\*:de,ab,ti OR factorial\*:de,ab,ti  
OR crossover\*:de,ab,ti OR ((cross NEXT/1 over\*):de,ab,ti)  
OR placebo\*:de,ab,ti OR ((doubl\* NEAR/1 blind\*):de,ab,ti)  
OR ((singl\* NEAR/1 blind\*):de,ab,ti) OR assign\*:de,ab,ti  
OR allocat\*:de,ab,ti OR volunteer\*:de,ab,ti  
#20 'animals'/exp NOT ('humans'/exp AND 'animals'/exp)  
#21 #19 NOT #20  
#22 #18 AND #21

### Cochrane Library

ID Searches  
#1 MeSH descriptor: [Prostatic Hyperplasia] explode all trees  
#2 (prostat\* near/3 hyperplasia\*):ti,ab,kw (Word variations  
have been searched)  
#3 (prostat\* near/3 hypertroph\*):ti,ab,kw (Word variations have  
been searched)  
#4 (prostat\* near/3 adenoma\*):ti,ab,kw (Word variations have  
been searched)  
#5 (BPH or BPO or BPE):ti,ab,kw (Word variations have been  
searched)  
#6 (prostat\* near/3 (enlarg\* or obstruct\*)):ti,ab,kw (Word varia-  
tions have been searched)  
#7 MeSH descriptor: [Prostatism] explode all trees  
#8 Prostatism:ti,ab,kw (Word variations have been searched)  
#9 MeSH descriptor: [Urinary Bladder Neck Obstruction] ex-  
plode all trees

#10 (((bladder\* near/3 obstruct\*) or BOO)):ti,ab,kw (Word variations have been searched)

#11 #1 or #2 or #3 or #4 or #5 or #6 or #7 or #8 or #9 or #10

#12 MeSH descriptor: [Adrenergic beta-3 Receptor Agonists] explode all trees

#13 ((beta3 or beta-3 or "beta 3") near/3 (agonist\* or adrenergic

or adrenoceptor)):ti,ab,kw

#14 (mirabegron or Betmiga or Betanis or "YM 178" or YM-178 or myrbetriq or "sc 211912" or sc211912):ti,ab,kw

#15 ("MVR3JL3B2V" or "223673-61-8"):ti,ab,kw

#16 #12 or #13 or #14 or #15

#17 #11 and #16
