# Supplementary material for: Beta 3 Adrenoreceptor Agonist for the Management of Lower Urinary Tract Symptoms in Men With Benign Prostatic Hyperplasia: A Systematic Review
Source: PubMed Central journal article supplement — Int Neurourol J. 2021 Sep 30;25(3):182–91. doi: 10.5213/inj.2142068.034 (PMC8497732; doi:10.5213/inj.2142068.034), 2021-09-30
Supplement: inj-2142068-034-suppl2.pdf [file inj-2142068-034-suppl2.pdf]

**Supplementary Material 2.** Characteristics of excluded studies

| Study                      | Reason                                                        |
|----------------------------|---------------------------------------------------------------|
| Kakizaki et al. [23] 2020  | Wrong study population (participants with overactive bladder) |
| Matsukawa et al. [26] 2019 | Wrong study population (participants with overactive bladder) |
| Nitti et al. [22] 2012     | Abstracts only                                                |
| Nitti et al. [23] 2013     | Wrong study population (participants with overactive bladder) |
| Tubaro et al. [12] 2017    | Wrong study population (participants with overactive bladder) |
| CTRI/2018/12/016541        | Ongoing                                                       |
